# Supplementary material for: Exploring cellular uptake, accumulation and mechanism of action of a cationic Ru-based nanosystem in human preclinical models of breast cancer
Source: PubMed Central journal article supplement (PMC6505035; doi:10.1038/s41598-019-43411-3), 2019-05-07
Supplement: 41598_2019_43411_MOESM3_ESM.pdf [file 41598_2019_43411_MOESM3_ESM.pdf]

## Exploring cellular uptake, accumulation and mechanism of action of a cationic Ru-based nanosystem in human preclinical models of breast cancer

Marialuisa Piccolo<sup>1,#</sup>, Gabriella Misso<sup>2,#</sup>, Maria Grazia Ferraro<sup>1</sup>, Claudia Riccardi<sup>3</sup>, Antonella Capuozzo<sup>1</sup>, Mayra Rachele Zarone<sup>2</sup>, Francesco Maione<sup>1</sup>, Marco Trifuoggi<sup>3</sup>, Paola Stiuso<sup>2</sup>, Gerardino D'Errico<sup>3,4</sup>, Michele Caraglia<sup>2</sup>, Luigi Paduano<sup>3,4,\*</sup>, Daniela Montesarchio<sup>3,\*</sup>, Carlo Irace<sup>1,°\*</sup> and Rita Santamaria<sup>1,°</sup>

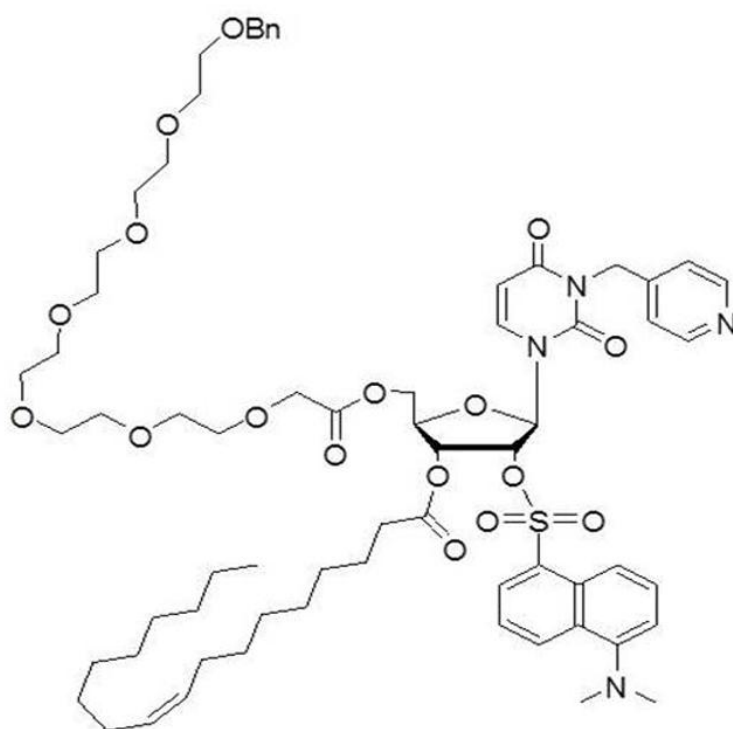

**Fig. S3.** Molecular structure of the nucleolipid HoThyDans.
